# Supplementary material for: Adherence to Prescribed Acamprosate in Alcohol Dependence and 1-Year Morbidities and Mortality: Utilizing a Data Linkage Methodology
Source: MDPI journal article supplement (doi:10.3390/jcm10102102), 2021-05-13
Supplement: s1 [file s1]

**Supplementary Table 1. Descriptive statistics of biochemistry at the baseline when Acamprosate® was initiated**

| Predictor  | Reference range | Mean (SD) | p-value |
|------------|-----------------|-----------|---------|
| <i>ALT</i> | F: ≤ 34 IU/L    | 45 (2.9)  | 0.125   |
|            | M: ≤ 45 IU/L    | 57 (3.4)  |         |
| <i>AST</i> | F: 6-34 IU/L    | 48 (1.2)  | 0.634   |
|            | M: 8-40 IU/L    | 57 (3.5)  |         |
| <i>GGT</i> | F: 5-55 IU/L    | 78 (6.5)  | 0.769   |
|            | M: 15-85 IU/L   | 97 (2.4)  |         |

ALT=ALanine aminotransferase; AST=ASpartate aminotransferase; γGT=Gamma-Glutamyl Transferase; SD= Standard Deviation;  $p < 0.05$

**Supplementary Table 2. Characteristics of individuals who died within 1 year of starting Acamprosate®.**

|                      | Total number and characteristics of individuals prescribed Acamprosate® | Individuals prescribed Acamprosate® and died within one year of the study |
|----------------------|-------------------------------------------------------------------------|---------------------------------------------------------------------------|
| <b>Number</b>        | 3319                                                                    | 252                                                                       |
| <b>Mean Age (SD)</b> | 48.41 (11.8)                                                            | 49.93 (12.1)                                                              |
| <b>Males</b>         | 2047 (61.0%)                                                            | 179 (71.0%)                                                               |
| <b>Females</b>       | 1272 (39.0%)                                                            | 72 (28.6%)                                                                |
| <b>SIMD</b>          |                                                                         |                                                                           |
| 1                    | 529 (16.0%)                                                             | 88 (34.9%)                                                                |
| 2                    | 471 (14.0%)                                                             | 65 (25.8%)                                                                |
| 3                    | 430 (12.6%)                                                             | 41 (16.3%)                                                                |
| 4                    | 374 (10.6%)                                                             | 23 (11.6%)                                                                |
| 5                    | 237 (8.0%)                                                              | 28 (6.0%)                                                                 |
|                      | 1176 (35.5%)                                                            |                                                                           |
| <b>Adherence</b>     |                                                                         |                                                                           |
| Low                  | 2732 (87.0%)                                                            | 217 (86.2%)                                                               |
| Good                 | 587 (13.0%)                                                             | 35 (13.8%)                                                                |
| <b>Alcohol</b>       |                                                                         |                                                                           |
| Direct               | 198 (31.0%)                                                             | 101 (40.8%)                                                               |
| Not Direct           | 323 (69.0%)                                                             | 151 (59.2%)                                                               |

SD= Standard Deviation; SUIMD= Scottish Index of Multiple Deprivation

**Supplementary Table 3. Multivariate association between covariates and all cause mortality.**

| <b>Predictor</b>                   | <b>HR</b> | <b>95% CI</b> | <b><i>p</i>-value</b> |
|------------------------------------|-----------|---------------|-----------------------|
| <i>Age</i>                         | 1.15      | 1.05-1.27     | <b>&lt;0.001</b>      |
| <i>Sex</i>                         |           |               | 0.001                 |
| M                                  | 0.082     | 0.013-0.53    | 0.027                 |
| F                                  | 0.104     | 0.02-0.67     | 0.046                 |
| <i>SIMD</i>                        | 1.125     | 1.02-1.24     | <0.05                 |
| <i>Low Adherence</i>               | 1.2       | 1.03-1.4      | <b>&lt;0.001</b>      |
| <i>Due to Alcohol</i>              | 0.99      | 0.86-1.2      | 0.957                 |
| <i>Number of other medications</i> |           |               |                       |
| 0                                  | 1.0       |               |                       |
| 1-2                                | 0.75      | 0.46-1.23     | n.s.                  |
| 3-5                                | 0.56      | 0.22-1.22     | n.s.                  |
| 6+                                 | 0.44      | 0.16-1.18     | n.s.                  |

n.s.= not significant; M=Male; F=Female; SIMD= Scottish Index of Multiple Deprivation  
HR=Hazard Ratio; CI= Confidence Interval
